# Supplementary material for: Self-agglomerated crystalline needles harnessing ESIPT and AIEE features for the ‘turn-on’ fluorescence detection of Al3+ ions
Source: Royal Society of Chemistry journal article supplement (doi:10.1039/c8nj03577f), 2018-01-01
Supplement: c8nj03577f1.pdf [file c8nj03577f1.pdf]

### Supportive information

#### **Self-agglomerated crystalline needles harnessing ESIPT and AIEE features for the 'turn-on' fluorescence detection of Al<sup>3+</sup> ions at nanomolar level**

Pranshu Puri, Gulshan Kumar, Kamaldeep Paul and Vijay Luxami\*

*School of Chemistry and Biochemistry, Thapar University, Patiala*

*E-mail: vluxami@thapar.edu*

#### **Table of Content**

**Figure S1.** <sup>1</sup>H-NMR of Probe **2**

**Figure S2.** <sup>13</sup>C NMR of Probe **2**

**Figure S3.** HR-MS spectrum of Probe **2**

**Figure S4.** Optimized structures of probe **2** in ground and excited States

**Figure S5.** Optimized structure of probe **2** as dimer get insight of aggregation with (a) side and (b) front view

**Figure S6.** DLS histogram for hydrodynamic diameter of Probe **2** in (a) THF; (b) 90% H<sub>2</sub>O-THF

**Figure S7.** Plot for determination of binding constant of Probe **2** (Benesi Hildebrand plot)

**Figure S8.** The linear response of probe **2** for Al<sup>3+</sup> ions

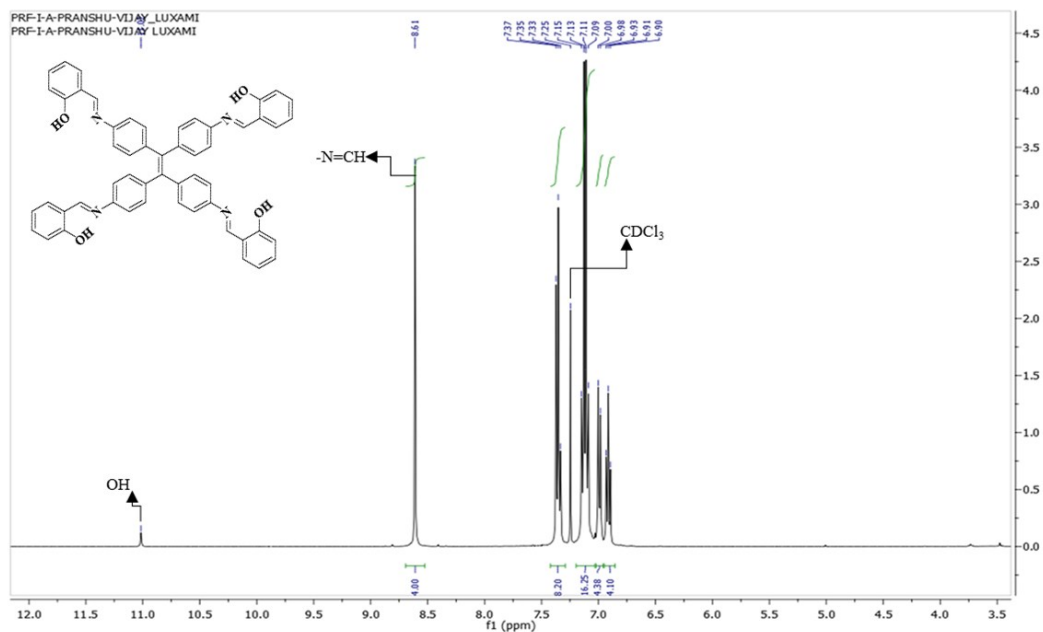

Figure S1. <sup>1</sup>H-NMR of Probe 2

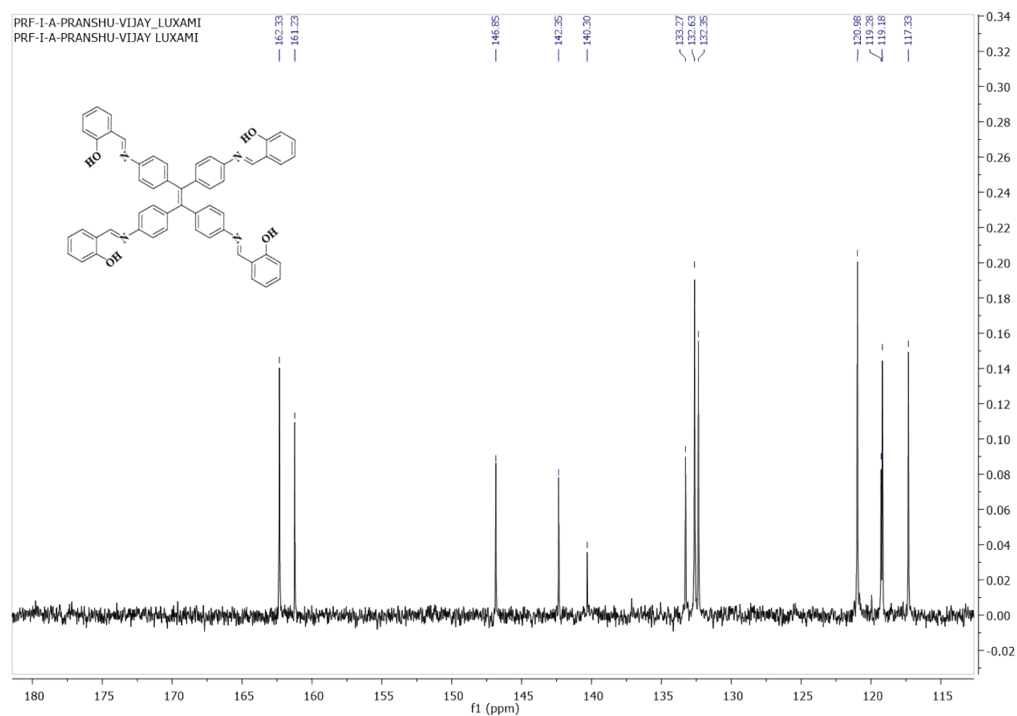

Figure S2. <sup>13</sup>C NMR of Probe 2

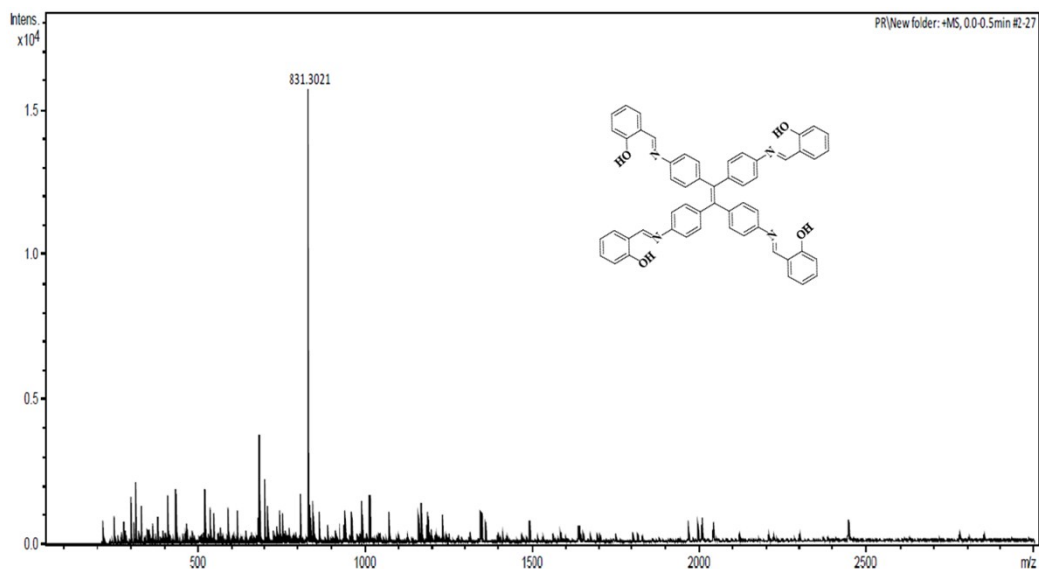

Figure S3. HR-MS spectrum of Probe 2

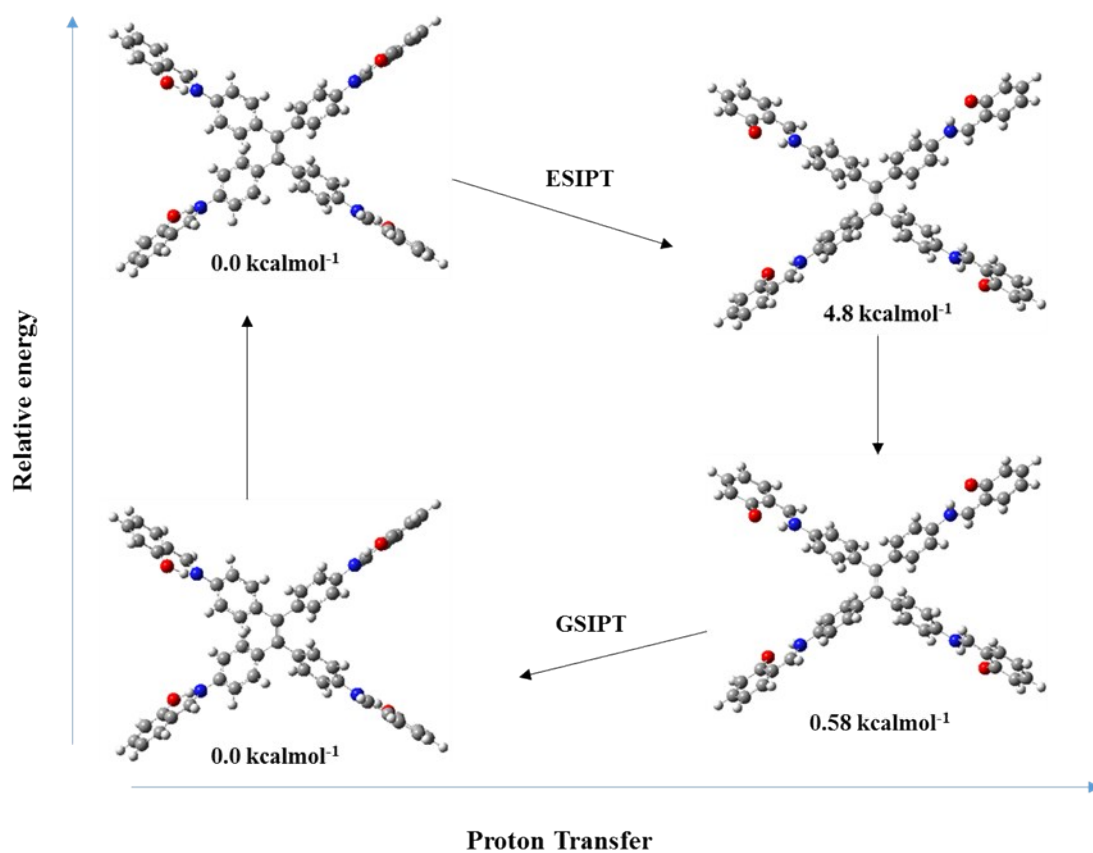

Figure S4. Optimized structures of probe 2 in ground and excited States

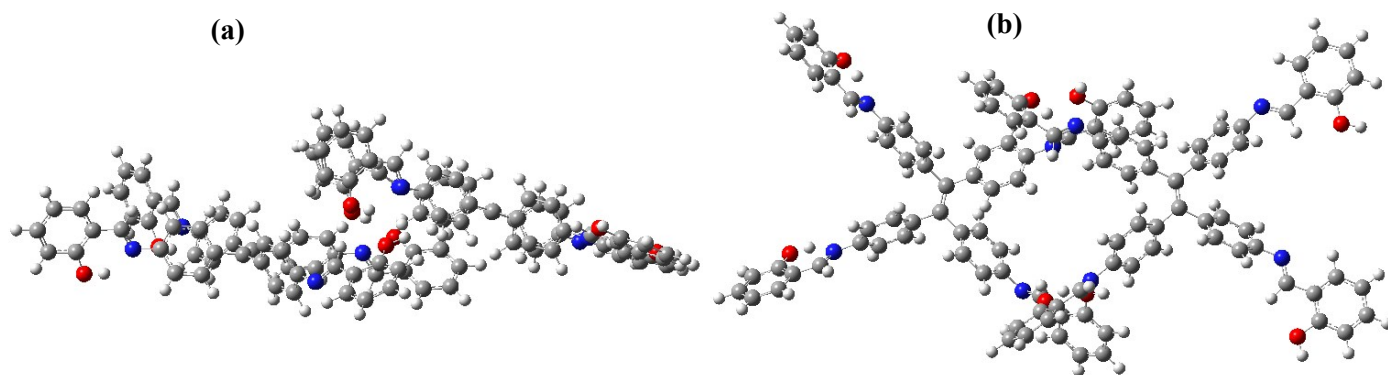

**Figure S5.** Optimized structure of probe **2** as dimer get insight of aggregation with (a) side and (b) front view.

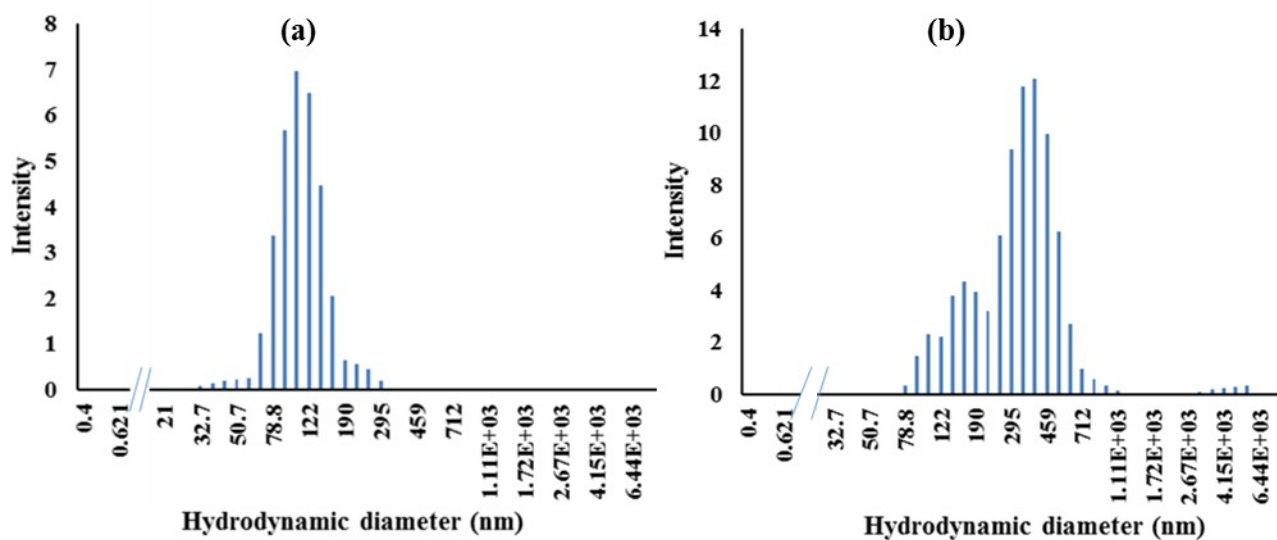

**Figure S6.** DLS histogram for hydrodynamic diameter of Probe **2** in (a) THF; (b) 90% H<sub>2</sub>O-THF

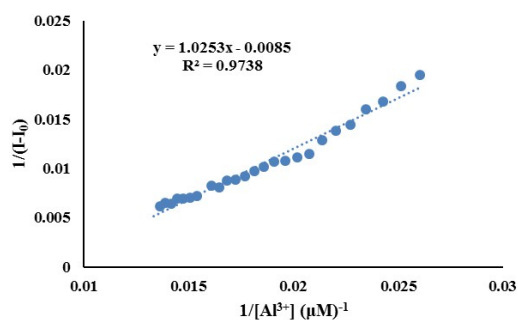

**Figure S7.** Plot for determination of binding constant of Probe **2** (Benesi Hildebrand plot)

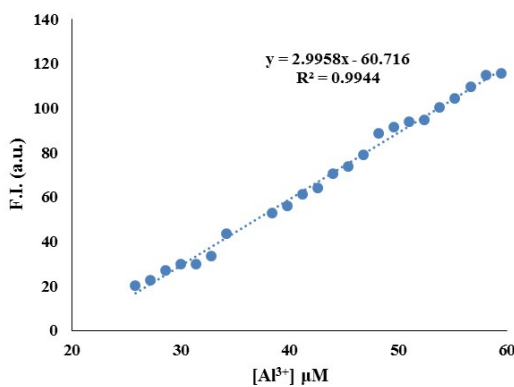

**Figure S8.** The linear response of probe **2** for  $\text{Al}^{3+}$  ions

| <b>Table S1.</b> A comparison of literature reported $\text{Al}^{3+}$ selective receptors |                        |                          |                  |             |
|-------------------------------------------------------------------------------------------|------------------------|--------------------------|------------------|-------------|
| <b>Group</b>                                                                              | <b>Detection limit</b> | <b>Emission Response</b> | <b>Mechanism</b> | <b>Ref.</b> |
| Gui <i>et al.</i>                                                                         | 21.6 nM                | "Turn-on"                | AIE              | 1           |
| Misra <i>et al.</i>                                                                       | 8.6 nM                 | "Turn-on"                | PET-AIE          | 2           |
| Tang <i>et al.</i>                                                                        | 21.7 $\mu\text{M}$     | "Turn-on"                | ESIPT            | 3           |
| Lee <i>et al.</i>                                                                         | 24 nM                  | "Turn-on"                | ESIPT            | 4           |
| Luxami <i>et al.</i>                                                                      | 0.27 $\mu\text{M}$     | "Turn-on"                | AIE+ESIPT        | 5           |
| Pang <i>et al.</i>                                                                        | 0.5 nM                 | "Turn-on"                | ESIPT            | 6           |
| Chen <i>et al.</i>                                                                        | 2.2 $\mu\text{M}$      | "Turn-on"                | AIE-ESIPT        | 7           |
| <b>Present Work</b>                                                                       | <b>10 nM</b>           | <b>"turn-on"</b>         | <b>AIE+ESIPT</b> |             |

1. S. Gui, Y. Huang, F. Hu, Y. Jin, G. Zhang, L. Yan, D. Zhang and R. Zhao, *Anal. Chem.*, 2015, 87, 1470-1474.
2. M. Shyamal, P. Mazumdar, S. Maity, G. P. Sahoo, G. Salgado-Morán and A. Misra, *J. Phys. Chem. A*, 2016, 120, 210-220.
3. J. Zhao, Y. Zhao, S. Xu, N. Luo and R. Tang, *Inorg. Chim. Acta*, 2015, 438, 105-111.
4. J. J. Lee, G. J. Park, Y. S. Kim, S. Y. Lee, H. J. Lee, I. Noh and C. Kim, *Biosens. Bioelectron.*, 2015, 69, 226-229.
5. G. Kumar, K. Paul and V. Luxami, *Sens. Actuators, B*, 2018, 263, 585-593.
6. J. Wang and Y. Pang, *RSC Adv.*, 2014, 4, 5845-5848.
7. Y. Chen, T. Wei, Z. Zhang, T. Chen, J. Li, J. Qiang, J. Lv, F. Wang and X. Chen, *Ind. Eng. Chem. Res.*, 2017, 56, 12267-12275.
